1 **AmyCo: the Amyloidoses Collection**

2 Katerina C. Nastou<sup>#</sup>, Georgia I. Nasi<sup>#</sup>, Paraskevi L. Tsiolaki<sup>#</sup>, Zoi I. Litou and  
3 Vassiliki A. Iconomidou\*

4 *Section of Cell Biology and Biophysics, Department of Biology, School of Sciences, National and*  
5 *Kapodistrian University of Athens, Panepistimiopolis, Athens 157 01, Greece*

6 <sup>#</sup>These authors contributed equally.

7 \*Corresponding Author

8 Address: Section of Cell Biology and Biophysics, Department of Biology, School of  
9 Sciences, National and Kapodistrian University of Athens, Athens 15701.

10 Phone: +30-210-7274871, Fax: +30-210-7274254, e-mail: [veconom@biol.uoa.gr](mailto:veconom@biol.uoa.gr)

11

12 **Katerina C. Nastou** is a Ph.D. student in Bioinformatics, at the Department of Biology of the  
13 National and Kapodistrian University of Athens. She is currently working on computational analysis  
14 of membrane and amyloidogenic proteins as part of her Ph.D. thesis. Her research focuses on the  
15 study of protein-protein interactions and the visualization and analysis of biological networks for  
16 these protein families, on the computational prediction of protein structure and function and the  
17 design and development of biological databases.

18

19 **Georgia I. Nasi** is a Ph.D. student in Biophysics, at the Department of Biology of the National and  
20 Kapodistrian University of Athens and a second year student in the Bioinformatics Master's Program,  
21 at the same department. She is currently conducting her Master's thesis on the computational analysis  
22 and visualization of the interaction network of amyloidoses and proteins associated with these  
23 disorders. Her research for her Ph.D. focuses on biophysical and computational analysis of  
24 amyloidogenic proteins and peptide-analogues associated with amyloidoses.

25

26 **Dr. Paraskevi L. Tsiolaki** is a Biologist with an MSc in Bioinformatics and a PhD in Molecular  
27 Biophysics. She is currently working as a postdoctoral fellow in Dr V. Iconomidou's group, Assist.  
28 Prof. at the National and Kapodistrian University of Athens and her research interests focus on  
29 Molecular Biophysics and Structural Biology. Her current research efforts have been directed  
30 towards identifying the structural characteristics that underlie the self-assembly mechanisms,

1 governing amyloidogenicity. More specifically she works on the structure and self-assembly of  
2 different amyloidogenic proteins or amyloidogenic peptide-analogues, implicated with amyloidoses,  
3 utilizing biophysical and biochemical techniques. She is also working on the computational and  
4 structural analysis of the anomalous type of protein-protein interactions in protein aggregation, with  
5 particular focus on the development of novel therapeutic intervention strategies.

6

7 **Dr.Zoi Litou** works as a Special Laboratory Teaching Staff in “Bioinformatics-Biophysics” at the  
8 Section of Cell Biology and Biophysics, Department of Biology, National & Kapodistrian University  
9 of Athens. She has a PhD in Bioinformatics. She is currently working on computational analysis of  
10 membrane proteins focusing on the automated recognition and classification of single-spanning  
11 membrane proteins, CWPs, GPCRs and Ion channels. Biological Network Analysis, Prediction  
12 algorithms, Algorithm Visualization techniques in Bioinformatics, High throughput sequencing  
13 analysis and visualization, Clustering Analysis, Knowledge discovery, management and  
14 representation, Data integration, Chemoinformatics, Pharmacogenomics, Text Mining in  
15 Bioinformatics, Personalized Medicine, Parallel programming.

16

17 **Dr. Vassiliki A. Iconomidou** is an Assistant Professor of Structural Biology/Molecular Biophysics  
18 and a group leader of Biophysics and Bioinformatics Lab at the Department of Biology of the  
19 National and Kapodistrian University of Athens. Her research interests include: 1) Structural and  
20 self-assembly studies of fibrous proteins, which form extracellular, proteinaceous structures of  
21 physiological importance like lepidopteran, dipteran and fish chorions and arthropod cuticle, 2)  
22 Structural and self-assembly studies of silkmoth chorion peptide-analogues as novel self-assembled  
23 polymers with amyloid properties, aiming at the construction of novel biomaterials with  
24 extraordinary physical properties, 3) Experimental studies of the role of a great variety of  
25 amyloidogenic (‘aggregation-prone’) peptides, predicted by our AMYLPRED prediction algorithm,  
26 in several widespread and also rare pathological amyloidoses. She had been visiting European  
27 Molecular Biology Laboratory (EMBL Heidelberg) for more than ten years, conducting research on  
28 molecular self-assembly focusing especially on functional, protective and pathological amyloids and  
29 amyloidoses, and she was there when she published the first article on natural protective amyloids.  
30 She is the author of 41 publications and 6 book chapters which focus mostly on functional and  
31 pathological amyloid studies.

32

## 1 **AmyCo: the Amyloidoses Collection**

2 Amyloid fibrils are formed when soluble proteins misfold into highly ordered insoluble  
3 fibrillar aggregates and affect various organs and tissues. The deposition of amyloid  
4 fibrils is the main hallmark of a group of disorders, called amyloidoses. Curiously, fibril  
5 deposition has been also recorded as a complication in a number of other pathological  
6 conditions, including well-known neurodegenerative or endocrine diseases. To date,  
7 amyloidoses are roughly classified, owing to their tremendous heterogeneity. In this  
8 work, we introduce AmyCo, a freely available collection of amyloidoses and clinical  
9 disorders related to amyloid deposition. AmyCo classifies 74 diseases associated with  
10 amyloid deposition into two distinct categories, namely 1) amyloidosis and 2) clinical  
11 conditions associated with amyloidosis. Each database entry is annotated with the major  
12 protein component (causative protein), other components of amyloid deposits and  
13 affected tissues or organs. Database entries are also supplemented with appropriate  
14 detailed annotation and are referenced to ICD-10, MeSH, OMIM, PubMed, AmyPro and  
15 UniProtKB databases. To our knowledge, AmyCo is the largest repository containing  
16 information about amyloidoses and diseases related to amyloid deposition. The AmyCo  
17 web interface is available at <http://bioinformatics.biol.uoa.gr/amyco>.

18 Keywords: amyloid, amyloidosis, database, aggregation, amyloid deposits

19

## 1 **Introduction**

2 Amyloidoses are a group of disorders typically characterized by the extracellular and/or  
3 intracellular deposition of misfolded protein aggregates, known as amyloid fibrils [1]. The  
4 deposition is mainly attributed to the abnormal transition of a soluble protein into highly  
5 ordered insoluble amyloid fibrils, which disrupts the normal tissue architecture and results in  
6 organ failure [2, 3, 4, 5]. Since their discovery, amyloidoses became the center of attention  
7 for the scientific community and underwent various classifications, mostly based on clinical  
8 observations [6, 7, 8]. A current classification system categorizes amyloidoses as either  
9 localized or systemic [8, 9, 10, 11], whereas other systems cluster amyloidoses as primary or  
10 secondary [12, 13], hereditary or acquired [6, 14] and parenchymal or mesenchymal [15].

11 “Amyloidosis” has long been used as a general term to describe a family of  
12 heterogenous pathologies, caused by the abnormal protein misfolding and deposition [6].  
13 Nevertheless, amyloid deposition is recorded as a clinical abnormality, occurring in a broad  
14 range of devastating, well-known or less common, disorders [16, 17]. Striking examples  
15 include the neurodegenerative Alzheimer disease [18, 19], with approximately 30 million  
16 people affected throughout the world and Diabetes Mellitus type 2 [20, 21], a metabolic  
17 disorder responsible for more than 1.5 million deaths annually [22]. Interestingly,  
18 amyloidosis was also traced as a rare complication of other clinical conditions with high  
19 prevalence in the human population, like certain types of cancer [23, 24, 25, 26, 27, 28, 29]  
20 and other severe diseases [30, 31, 32, 33].

21 To date, there are a few studies that systematically gather data for amyloidoses and  
22 store them in biological databases. Such examples are the Mutations in Hereditary  
23 Amyloidosis database [14], AL-Base [34], AlzGene [35], PDGene [36], PDBase [37] and  
24 AD&FTDMD [38]. However, it is evident, by looking up all previous systematic studies,

1 that the majority of currently available repositories are mainly dedicated to well-studied  
2 diseases, while there is a lack of systematic approaches for the most rare and understudied  
3 disorders, associated with amyloid deposition. This fact stresses the importance of creating  
4 an up-to-date database that can assemble and categorize the heterogeneous group of diseases,  
5 originating from the deposition of amyloid fibrils.

6       Considering all these aspects, in this study we introduce AmyCo, a comprehensive,  
7 well-annotated and updated online collection, which contains data for 74 disorders associated  
8 with amyloid deposition. AmyCo entries were thoroughly gathered and supplemented with  
9 detailed annotation. Hyperlinks to ICD-10 [39], MeSH [40], OMIM [41], PubMed [42],  
10 AmyPro [43] and UniProtKB [44] databases were also included as additional disease details.  
11 To our knowledge, AmyCo is currently the most extensive database for the remarkably  
12 heterogeneous group of diseases, emerging from the deposition of amyloid fibrils.

13

## 14 **Methods**

### 15 *AmyCo Data collection and Classification*

16 AmyCo disease entries were collected through an extensive literature search (March 2018,  
17 PubMed [42]). A total of 249 studies, indexed in PubMed, were used (Please refer to  
18 Supplementary File 1 for more details). Data were additionally manipulated and diseases  
19 were classified into two broad categories, based on the following scheme:

- 20       • Amyloidosis, when amyloid deposition is the main disease cause (e.g. AL  
21       amyloidosis, Alzheimer disease)
- 22       • Clinical conditions associated with amyloidosis, when amyloid deposition is detected  
23       but is neither the main nor the common disease cause (e.g. amyloid deposition in  
24       Waldenström's macroglobulinemia)

1

## 2 *AmyCo Disease Nomenclature*

3 Disease entry names were thoroughly reviewed and selected. The following nomenclature  
4 scheme was used for the main disease name:

- 5 • a MeSH name is assigned as a disease name when a disorder is recorded as a MeSH  
6 entry
- 7 • an ICD-10 name, is assigned as a disease name when there is no available MeSH  
8 entry, and
- 9 • the most common name of the disease found in the scientific literature is assigned as a  
10 disease name when a disease has neither a MeSH nor an ICD-10 entry.

11 Common or less common disease names were also included as alternative disease  
12 terms. The International Society of Amyloidosis (ISA) nomenclature was additionally added  
13 for disease entries related to the majority of proteins that have been recorded as amyloid fibril  
14 proteins in human according to the ISA [45].

## 15 *Additional AmyCo features*

16 Each database entry was manually annotated with major protein components (causative  
17 protein) and minor protein components. The latter were especially included in the  
18 “Amyloidosis” category in an attempt to correlate distinct protein components that happen to  
19 be co-deposited in the amyloid plaques of one or more conditions [46, 47]. Co-deposited  
20 components are experimentally verified by either immunohistochemistry, MS-based  
21 proteomics, staining or imaging techniques [46, 47, 48, 49, 50]. Protein nomenclature, used  
22 throughout the database, follows the modern guidelines suggested by the ISA [45]. In  
23 addition to this feature, diseases belonging to the “Clinical conditions associated with

1 amyloidosis” category were annotated with a related “Amyloidosis” category, utilizing a  
2 hyperlinked section. This AmyCo feature unravels the relationship between pathologies at a  
3 disease level, based on existing literature data.

4 For each entry, information about the respective disease and associated proteins is  
5 provided, along with literature references (PubMed [42]), cross-references to major publicly  
6 available disease databases -when available- (MeSH [40], ICD [39], OMIM [41]) and protein  
7 databases (UniProt [44], AmyPro [43]). Tissues or organs affected by amyloid deposits were  
8 also collected from the literature and added as additional disease details [42]. Entries, which  
9 have MeSH records, were further enriched with a MeSH description [40]. A supplementary  
10 disease subdivision was embed, based on the well-established ICD-10 classification scheme  
11 [39].

## 12 *AmyCo Implementation*

13 A web application for AmyCo has been created with a two-layer approach; a mySQL  
14 database system and a Node.js application server. The first layer consists of a mySQL  
15 database management system, with all disease and protein data stored in a relational database.  
16 The second layer is a Node.js application server that receives user queries to the database and  
17 returns data to the web browser. The web interface is based on modern technologies  
18 (HTML5, CSS3 and Javascript) and can be viewed from any screen size (desktop, tablet or  
19 mobile). A CytoscapeJS [51] viewer is integrated for the visualization of the association  
20 between diseases and protein components of amyloid deposits.

21

## 1 **Results & Discussion**

2 The deposition of amyloid fibrils has been linked to the development of a broad class of life-  
3 threatening diseases, called amyloidoses [1]. While amyloid fibril deposition has been  
4 recorded as a major and/or minor complication in a number of pathological conditions, it still  
5 remains unclear whether it is the cause or the consequence of these diseases [16]. Despite  
6 intensive studies during the past decades in the field of amyloid research, until now there is a  
7 lack of a standard classification for amyloidoses. In this work, we created AmyCo, a novel  
8 manually curated collection of amyloidoses and clinical conditions associated with amyloid  
9 deposition. AmyCo displays a novel classification system for these rare disorders and  
10 provides links to important literature references and other significant disease databases. To  
11 the best of our knowledge, AmyCo collects the largest number of disorders (74) related to  
12 amyloid deposition and associates proteins acting as principal causative disease agents (83).  
13 A detailed comparison between AmyCo and other available resources is presented in Table 1.

14 One of the main challenges during the creation of AmyCo was to manually filter the  
15 plethora of available information, form the final non-redundant dataset of diseases and clarify  
16 nomenclatures for both the diseases and their associated proteins. In a similar way, an  
17 interesting approach to group amyloidosis, based on the type of precursor proteins that form  
18 insoluble amyloid fibrils, was introduced by Misumi and Ando, back in 2014 [52]. In turn,  
19 our final classification scheme divided 74 diseases into two distinct categories, namely  
20 “amyloidosis” and “clinical conditions associated with amyloidosis” (Please see Materials  
21 and Methods for more details). This classification scheme allowed us to unify current and  
22 older nomenclatures, accurately allocate alternative disease names, and subsequently, gather  
23 relevant knowledge from both the scientific literature [42] and other more generic databases  
24 [39, 40, 41]. Literature data reveal that when it comes to amyloidoses there is a variable use  
25 of terms [8, 53], despite the efforts of the ISA nomenclature committee to establish a



1 common classification system [6, 45, 54]. Alternative disease terms were included in an  
2 attempt to ensure the consistency of our database and improve the overall information flow.  
3 Universal MeSH and ICD-10 terms were assigned as the main disease name, following the  
4 scheme described in the Materials and Methods section. Thus, AmyCo is a valuable  
5 reference for anyone using contemporary nomenclature or older disease designations that are  
6 still extensively in use in the literature.

7 At the same time, 83 experimentally validated protein components of amyloid  
8 deposits were assigned to each of the diseases (Figure 1). The ISA classification system was  
9 used as a reference for the nomenclature of these protein components. The co-existence of  
10 proteins in amyloid deposits gained a lot of attention due to its established connection with  
11 protein aggregation [17, 55]. A variety of experimental techniques, direct or indirect, are  
12 used to capture this common phenomenon [46, 47, 48, 49, 50]. Such examples are the  
13 Gerstmann-Straussler-Scheinker Syndrome, where amyloid PrP (APrP) and A $\beta$  are both  
14 found in amyloid plaques [49], or the Alzheimer's disease, in which many proteinaceous  
15 components have been recorded as co-deposits of the amyloid plaques [48, 56, 57]. Co-  
16 deposition of proteins, occurred either through cross-seeding [17, 55] or cross-inhibition [17,  
17 55] is an extremely important detail for these rare diseases, as it could be a key starting point  
18 towards associating the majority of amyloid-related diseases and understanding the inevitable  
19 cascade of protein aggregation.

20 Apart from the systematic data collection from the scientific literature, which will be  
21 performed in a regular basis in order to maintain AmyCo records, an interesting option is the  
22 feature that allows the scientific community contribution. User contribution is an inseparable  
23 component of biological databases that wish to stay updated and incorporate the ever-  
24 growing biological knowledge [58, 59]. Furthermore, community annotation allows the

1 synergy between curators and researchers, helps towards the maintenance of a repository and  
2 promotes interdisciplinary collaborations [60]. In the case of AmyCo, user annotation is a  
3 feature of utmost importance, since this collection was based upon the entire scientific  
4 literature (Supplementary File 1) and thus, some data may be falsely filtered out or certain  
5 biases may be reflected during the disease collection. More importantly, there is an excessive  
6 amount of information about amyloidoses that is generated daily by the community and  
7 added to the amyloid research vault. A submission form, provided in the contact page of the  
8 AmyCo v1.1 web application, allows user annotation and welcomes the insertion of  
9 comments or new data. This utility renders AmyCo a valuable tool for the interaction of the  
10 scientific community dealing with amyloidoses.

### 11 *User interface and website features*

12 The AmyCo database has a user-friendly interface that offers convenient ways to gain access  
13 into its data. The ‘Home’ page provides a short description and database statistics. From the  
14 navigation bar, at the top of every page, users can either perform searches or browse the  
15 database contents. A ‘Manual’ page explaining the functionalities of AmyCo, a ‘Contact’  
16 page with author contact information and a submission form for user contribution are also  
17 available.

18 Search queries utilize either simple protein and disease names or the more complex  
19 UniProt ACs/IDs [44] and HUGO Gene Names [61]. Terms can be used indiscriminately by  
20 the user as active search keywords, provided that are spelt correctly (Please refer to  
21 Supplementary File 2 for more details). Results can be sorted by using our disease  
22 classification system. While browsing AmyCo, a user can have access to all disease entries  
23 or filter them by disease category and/or ICD-10 classification [39]. Results retrieved from  
24 both browsing and searching the database are displayed in tables. Direct links to disease

1 entry pages are given at the end of each row. An additional BLAST search tool[62] is  
2 integrated for running protein BLAST searches against the database, using as input one or  
3 more FASTA formatted sequences [63].

4 AmyCo is currently available in three formats (text, XML and JSON) and is supported  
5 for download by the ‘Download’ button, at the top navigation bar. The AmyCo manual is  
6 also provided as a separate supplementary file (Supplementary File 2).

### 7 ***Disease Entries***

8 Database entries are generated dynamically via browsing, searching or through direct URL  
9 links. As shown in Figure 1, direct links for data downloading are provided on the top of  
10 each page. A table displaying all entry sections (e.g. disease name, ISA name, alternative  
11 name etc.) is also available. CytoscapeJS [51] is used to visualize all the relationships  
12 between a disease and its associated proteins in a comprehensive functional context [64].  
13 Detailed information about each related protein can be also viewed by pressing the respective  
14 button. Major protein components are also supplemented with AmyPro links [43] and useful  
15 literature references, whereas experimental evidence is also provided for all the co-deposited  
16 amyloid components. External interconnections with literature references, disease  
17 repositories and protein databases enhance each disease entry with significant details (Please  
18 refer to the Supplementary File 2).

### 19 **Conclusions**

20 AmyCo assembles and categorizes the heterogeneous group of diseases, associated with the  
21 deposition of amyloid fibrils. Our novel database provides a uniform access to data recorded  
22 in different literature sources and classifies 74 diseases into two distinct categories, namely 1)  
23 amyloidosis and 2) clinical conditions associated with amyloidosis. The added value of

1 detailed literature references and the manual annotation feature render AmyCo a unique  
2 database for diseases associated with amyloid deposition. It is hoped that this approach will  
3 aid both clinical scientists and researchers, in the need of a comprehensive resource,  
4 referencing biological information on amyloidoses. AmyCo is available at  
5 <http://bioinformatics.biol.uoa.gr/amyco>

6

## 7 **Disclosure statement**

8 The authors declare no conflict of interest

9

## 10 **Acknowledgements**

11 The authors thank the National and Kapodistrian University of Athens for support. The  
12 authors would also like to thank the anonymous reviewers and the handling editor for their  
13 valuable comments and constructive criticism.

14

## 15 **Author Contributions**

16 Study design: KCN, GIN, PLT, ZIL, VAI; Conceptualization: ZIL, KCN, VAI; Literature  
17 and Database search: GIN; Database design and development: KCN; Data Curation: PLT,  
18 GIN, KCN, ZIL; Web Application Design: KCN; Web Application Quality Assurance: PLT,  
19 GIN, KCN, ZIL, VAI; Writing - original draft: KCN, GIN, PLT; Writing - review and  
20 editing: GIN, PLT, KCN, ZIL, VAI; Supervision: VAI; Funding Acquisition: VAI.

1

## 2 **Funding**

3 The present work was co-funded by the European Union and Greek national funds through  
4 the Operational Program "Competitiveness, Entrepreneurship and Innovation", under the call  
5 "RESEARCH-CREATE-INNOVATE" (project code: 00353).

6

7

## 1    **References**

- 2    1.    Hazenberg BP. Amyloidosis: a clinical overview. *Rheumatic diseases clinics of North*  
3    *America*. 2013 May;39(2):323-45. doi: 10.1016/j.rdc.2013.02.012. PubMed PMID: 23597967.
- 4    2.    Winklhofer KF, Tatzelt J, Haass C. The two faces of protein misfolding: gain- and loss-of-  
5    function in neurodegenerative diseases. *The EMBO journal*. 2008 Jan 23;27(2):336-49. doi:  
6    10.1038/sj.emboj.7601930. PubMed PMID: 18216876; PubMed Central PMCID: PMC2234348.
- 7    3.    Valastyan JS, Lindquist S. Mechanisms of protein-folding diseases at a glance. *Disease*  
8    *models & mechanisms*. 2014 Jan;7(1):9-14. doi: 10.1242/dmm.013474. PubMed PMID: 24396149;  
9    PubMed Central PMCID: PMC3882043.
- 10    4.    Agorogiannis EI, Agorogiannis GI, Papadimitriou A, et al. Protein misfolding in  
11    neurodegenerative diseases. *Neuropathology and applied neurobiology*. 2004 Jun;30(3):215-24. doi:  
12    10.1111/j.1365-2990.2004.00558.x. PubMed PMID: 15175075.
- 13    5.    Soto C. Protein misfolding and disease; protein refolding and therapy. *FEBS letters*. 2001 Jun  
14    8;498(2-3):204-7. PubMed PMID: 11412858.
- 15    6.    Sipe JD, Benson MD, Buxbaum JN, et al. Amyloid fibril protein nomenclature: 2012  
16    recommendations from the Nomenclature Committee of the International Society of Amyloidosis.  
17    *Amyloid : the international journal of experimental and clinical investigation : the official journal of*  
18    *the International Society of Amyloidosis*. 2012 Dec;19(4):167-70. doi:  
19    10.3109/13506129.2012.734345. PubMed PMID: 23113696.
- 20    7.    Husby G, Sletten K. Chemical and clinical classification of amyloidosis 1985. *Scandinavian*  
21    *journal of immunology*. 1986 Mar;23(3):253-65. PubMed PMID: 3082001.
- 22    8.    Westermark P, Benson MD, Buxbaum JN, et al. A primer of amyloid nomenclature. *Amyloid*  
23    *: the international journal of experimental and clinical investigation : the official journal of the*  
24    *International Society of Amyloidosis*. 2007 Sep;14(3):179-83. doi: 10.1080/13506120701460923.  
25    PubMed PMID: 17701465.
- 26    9.    Blancas-Mejia LM, Ramirez-Alvarado M. Systemic amyloidoses. *Annual review of*  
27    *biochemistry*. 2013;82:745-74. doi: 10.1146/annurev-biochem-072611-130030. PubMed PMID:  
28    23451869; PubMed Central PMCID: PMC4044913.
- 29    10.    Westermark P. Localized AL amyloidosis: a suicidal neoplasm? *Upsala journal of medical*  
30    *sciences*. 2012 May;117(2):244-50. doi: 10.3109/03009734.2012.654861. PubMed PMID: 22335280;  
31    PubMed Central PMCID: PMC3339556.
- 32    11.    Falk RH, Comenzo RL, Skinner M. The systemic amyloidoses. *The New England journal of*  
33    *medicine*. 1997 Sep 25;337(13):898-909. doi: 10.1056/NEJM199709253371306. PubMed PMID:  
34    9302305.
- 35    12.    Symmers WS. Primary amyloidosis: a review. *Journal of clinical pathology*. 1956  
36    Aug;9(3):187-211. PubMed PMID: 13357618; PubMed Central PMCID: PMC1023944.

- 1 13. Fisher JH. Primary amyloidosis. *Canadian Medical Association journal*. 1958 Feb  
2 15;78(4):264-6. PubMed PMID: 13511290; PubMed Central PMCID: PMC1829637.
  
- 3 14. Rowczenio DM, Noor I, Gillmore JD, et al. Online registry for mutations in hereditary  
4 amyloidosis including nomenclature recommendations. *Human mutation*. 2014 Sep;35(9):E2403-12.  
5 doi: 10.1002/humu.22619. PubMed PMID: 25044787.
  
- 6 15. Gillmore JD, Hawkins PN. Amyloidosis and the respiratory tract. *Thorax*. 1999  
7 May;54(5):444-51. PubMed PMID: 10212113; PubMed Central PMCID: PMC1763786.
  
- 8 16. Pepys MB. Amyloidosis [Research Support, Non-U.S. Gov't  
9 Review]. *Annual review of medicine*. 2006;57:223-41. doi: 10.1146/annurev.med.57.121304.131243.  
10 PubMed PMID: 16409147; eng.
  
- 11 17. Eisenberg D, Jucker M. The amyloid state of proteins in human diseases. *Cell*. 2012 Mar  
12 16;148(6):1188-203. doi: 10.1016/j.cell.2012.02.022. PubMed PMID: 22424229; PubMed Central  
13 PMCID: PMC3353745.
  
- 14 18. Glenner GG, Wong CW. Alzheimer's disease: initial report of the purification and  
15 characterization of a novel cerebrovascular amyloid protein. *Biochemical and biophysical research  
16 communications*. 1984 May 16;120(3):885-90. PubMed PMID: 6375662.
  
- 17 19. Alzheimer A, Stelzmann RA, Schnitzlein HN, et al. An English translation of Alzheimer's  
18 1907 paper, "Über eine eigenartige Erkrankung der Hirnrinde". *Clinical anatomy*. 1995;8(6):429-31.  
19 doi: 10.1002/ca.980080612. PubMed PMID: 8713166.
  
- 20 20. Westermark P, Wernstedt C, O'Brien TD, et al. Islet amyloid in type 2 human diabetes  
21 mellitus and adult diabetic cats contains a novel putative polypeptide hormone. *The American journal  
22 of pathology*. 1987 Jun;127(3):414-7. PubMed PMID: 3296768; PubMed Central PMCID:  
23 PMC1899776.
  
- 24 21. Johnson KH, O'Brien TD, Betsholtz C, et al. Islet amyloid, islet-amyloid polypeptide, and  
25 diabetes mellitus. *The New England journal of medicine*. 1989 Aug 24;321(8):513-8. doi:  
26 10.1056/NEJM198908243210806. PubMed PMID: 2668761.
  
- 27 22. Mathers CD, Loncar D. Projections of global mortality and burden of disease from 2002 to  
28 2030. *PLoS medicine*. 2006 Nov;3(11):e442. doi: 10.1371/journal.pmed.0030442. PubMed PMID:  
29 17132052; PubMed Central PMCID: PMC1664601.
  
- 30 23. Nomenclature of amyloid and amyloidosis. WHO-IUIS Nomenclature Sub-Committee.  
31 *Bulletin of the World Health Organization*. 1993;71(1):105-12. PubMed PMID: 8440029; PubMed  
32 Central PMCID: PMC2393434.
  
- 33 24. Ogami Y, Takasugi M, Soejima M, et al. Waldenström's macroglobulinemia associated with  
34 amyloidosis and crescentic glomerulonephritis. *Nephron*. 1989;51(1):95-8. doi: 10.1159/000185250.  
35 PubMed PMID: 2492644.
  
- 36 25. Tschang TP. Nodular malignant lymphoma and amyloidosis. A case report. *Cancer*. 1976  
37 Nov;38(5):2192-6. PubMed PMID: 1086712.

- 1 26. Hashimoto K, Brownstein MH. Localized amyloidosis in basal cell epitheliomas. *Acta*  
2 *dermato-venereologica*. 1973;53(5):331-9. PubMed PMID: 4127464.
- 3 27. Azzopardi JG, Lehner T. Systemic amyloidosis and malignant disease. *Journal of clinical*  
4 *pathology*. 1966 Nov;19(6):539-48. PubMed PMID: 5953729; PubMed Central PMCID:  
5 PMC473378.
- 6 28. Romero LS, Kantor GR, Levin MW, et al. Localized cutaneous amyloidosis associated with  
7 mycosis fungoides. *Journal of the American Academy of Dermatology*. 1997 Jul;37(1):124-7.  
8 PubMed PMID: 9216538.
- 9 29. Ordi J, Grau JM, Junque A, et al. Secondary (AA) amyloidosis associated with Castleman's  
10 disease. Report of two cases and review of the literature. *American journal of clinical pathology*. 1993  
11 Oct;100(4):394-7. PubMed PMID: 8213634.
- 12 30. Cohen AS, Frensdorff A, Lamprecht S, et al. A study of the fine structure of the amyloid  
13 associated with familial Mediterranean fever. *The American journal of pathology*. 1962 Nov;41:567-  
14 78. PubMed PMID: 14022004; PubMed Central PMCID: PMC1949617.
- 15 31. Fam AG, Lewis AJ, Cowan DH. Multiple myeloma and amyloid bone lesions complicating  
16 rheumatoid arthritis. *The Journal of rheumatology*. 1981 Sep-Oct;8(5):845-50. PubMed PMID:  
17 7310780.
- 18 32. Alabi ZO, Ojo OS, Odesanmi WO. Secondary amyloidosis in chronic osteomyelitis.  
19 *International orthopaedics*. 1991;15(1):21-2. PubMed PMID: 2071276.
- 20 33. Yeoman W, Wilson JV. Rheumatoid arthritis and amyloid disease; report of a case. *British*  
21 *medical journal*. 1947 Sep 27;2(4525):483-5. PubMed PMID: 20266988; PubMed Central PMCID:  
22 PMC2055788.
- 23 34. Bodi K, Prokaeva T, Spencer B, et al. AL-Base: a visual platform analysis tool for the study  
24 of amyloidogenic immunoglobulin light chain sequences. *Amyloid : the international journal of*  
25 *experimental and clinical investigation : the official journal of the International Society of*  
26 *Amyloidosis*. 2009 Mar;16(1):1-8. doi: 10.1080/13506120802676781. PubMed PMID: 19291508;  
27 PubMed Central PMCID: PMC4123194.
- 28 35. Bertram L, McQueen MB, Mullin K, et al. Systematic meta-analyses of Alzheimer disease  
29 genetic association studies: the AlzGene database. *Nature genetics*. 2007 Jan;39(1):17-23. doi:  
30 10.1038/ng1934. PubMed PMID: 17192785.
- 31 36. Lill CM, Roehr JT, McQueen MB, et al. Comprehensive research synopsis and systematic  
32 meta-analyses in Parkinson's disease genetics: The PDGene database. *PLoS genetics*.  
33 2012;8(3):e1002548. doi: 10.1371/journal.pgen.1002548. PubMed PMID: 22438815; PubMed  
34 Central PMCID: PMC3305333 the company. MJ Farrer and Mayo Foundation received royalties from  
35 H.Lundbeck A/S and Isis Pharmaceuticals. In addition, MJ Farrer has received an honorarium for a  
36 seminar at Genzyme. T Gasser has received consultancy fees from Cephalon and Merck-Serono,  
37 grants from Novartis, payments for lectures including service on speakers' bureaus from Boehringer  
38 Ingelheim, Merck-Serono, UCB, and Valean, and holds patents NGFN2 and KASPP. JA Hardy has  
39 received consulting fees or honoraria from Eisai and his institute has received consulting fees or  
40 honoraria from Merck-Serono. DM Maraganore has received extramural research funding support



- 1 from the National Institutes of Health (2R01 ES10751), the Michael J. Fox Foundation (Linked  
2 Efforts to Accelerate Parkinson Solutions Award, Edmond J. Safra Global Genetics Consortia  
3 Award), and from Alnylam Pharmaceuticals and Medtronic (observational studies of Parkinson's  
4 disease). DM Maraganore has also received intramural research funding support from the Mayo  
5 Clinic and from NorthShore University Health System. DM Maraganore filed a provisional patent for  
6 a method to predict Parkinson's disease. This provisional patent is unlicensed. He also filed a  
7 provisional patent for a method to treat neurodegenerative disorders. That provisional patent has been  
8 licensed to Alnylam Pharmaceuticals and DM Maraganore has received royalty payments in total of  
9 less than \$20,000. K Stefansson has received grants from deCODE.
- 10 37. Yang JO, Kim WY, Jeong SY, et al. PDbase: a database of Parkinson's disease-related genes  
11 and genetic variation using substantia nigra ESTs. *BMC genomics*. 2009 Dec 3;10 Suppl 3:S32. doi:  
12 10.1186/1471-2164-10-S3-S32. PubMed PMID: 19958497; PubMed Central PMCID: PMC2788386.
- 13 38. Cruts M, Theuns J, Van Broeckhoven C. Locus-specific mutation databases for  
14 neurodegenerative brain diseases. *Human mutation*. 2012 Sep;33(9):1340-4. doi:  
15 10.1002/humu.22117. PubMed PMID: 22581678; PubMed Central PMCID: PMC3465795.
- 16 39. WHO. International classification of diseases and related health problems, 10th revision.  
17 Geneva: World Health Organization. 1992.
- 18 40. Rogers FB. Medical subject headings. *Bulletin of the Medical Library Association*. 1963  
19 Jan;51:114-6. PubMed PMID: 13982385; PubMed Central PMCID: PMC197951.
- 20 41. Amberger JS, Bocchini CA, Schiettecatte F, et al. OMIM.org: Online Mendelian Inheritance  
21 in Man (OMIM(R)), an online catalog of human genes and genetic disorders. *Nucleic acids research*.  
22 2015 Jan;43(Database issue):D789-98. doi: 10.1093/nar/gku1205. PubMed PMID: 25428349;  
23 PubMed Central PMCID: PMC4383985.
- 24 42. Coordinators NR. Database Resources of the National Center for Biotechnology Information.  
25 *Nucleic acids research*. 2017 Jan 4;45(D1):D12-D17. doi: 10.1093/nar/gkw1071. PubMed PMID:  
26 27899561; PubMed Central PMCID: PMC5210554.
- 27 43. Varadi M, De Baets G, Vranken WF, et al. AmyPro: a database of proteins with validated  
28 amyloidogenic regions. *Nucleic acids research*. 2018 Jan 4;46(D1):D387-D392. doi:  
29 10.1093/nar/gkx950. PubMed PMID: 29040693; PubMed Central PMCID: PMC5753394.
- 30 44. Pundir S, Martin MJ, O'Donovan C. UniProt Protein Knowledgebase. *Methods in molecular  
31 biology*. 2017;1558:41-55. doi: 10.1007/978-1-4939-6783-4\_2. PubMed PMID: 28150232; PubMed  
32 Central PMCID: PMC5565770.
- 33 45. Sipe JD, Benson MD, Buxbaum JN, et al. Amyloid fibril proteins and amyloidosis: chemical  
34 identification and clinical classification International Society of Amyloidosis 2016 Nomenclature  
35 Guidelines. *Amyloid : the international journal of experimental and clinical investigation : the official  
36 journal of the International Society of Amyloidosis*. 2016 Dec;23(4):209-213. doi:  
37 10.1080/13506129.2016.1257986. PubMed PMID: 27884064.
- 38 46. Valleix S, Verona G, Jourde-Chiche N, et al. D25V apolipoprotein C-III variant causes  
39 dominant hereditary systemic amyloidosis and confers cardiovascular protective lipoprotein profile

- 1 [Research Support, Non-U.S. Gov't]. *Nature communications*. 2016 Jan 21;7:10353. doi:  
2 10.1038/ncomms10353. PubMed PMID: 26790392; PubMed Central PMCID: PMC4735822. eng.
- 3 47. Lavatelli F, di Fonzo A, Palladini G, et al. Systemic amyloidoses and proteomics: The state of  
4 the art. *EuPA Open Proteomics*. 2016 2016/06/01;11:4-10. doi:  
5 <https://doi.org/10.1016/j.euprot.2016.02.003>.
- 6 48. Shoji M, Hirai S, Yamaguchi H, et al. Alpha 1-antichymotrypsin is present in diffuse senile  
7 plaques. A comparative study of beta-protein and alpha 1-antichymotrypsin immunostaining in the  
8 Alzheimer brain. *The American journal of pathology*. 1991 Jan;138(1):247-57. PubMed PMID:  
9 1702930; PubMed Central PMCID: PMC1886058.
- 10 49. Miyazono M, Kitamoto T, Iwaki T, et al. Colocalization of prion protein and beta protein in  
11 the same amyloid plaques in patients with Gerstmann-Straussler syndrome. *Acta neuropathologica*.  
12 1992;83(4):333-9. PubMed PMID: 1349451.
- 13 50. Nasr SH, Dasari S, Hasadsri L, et al. Novel Type of Renal Amyloidosis Derived from  
14 Apolipoprotein-CII. *Journal of the American Society of Nephrology : JASN*. 2017 Feb;28(2):439-  
15 445. doi: 10.1681/ASN.2015111228. PubMed PMID: 27297947; PubMed Central PMCID:  
16 PMC5280007.
- 17 51. Franz M, Lopes CT, Huck G, et al. Cytoscape.js: a graph theory library for visualisation and  
18 analysis. *Bioinformatics*. 2016 Jan 15;32(2):309-11. doi: 10.1093/bioinformatics/btv557. PubMed  
19 PMID: 26415722; PubMed Central PMCID: PMC4708103.
- 20 52. Misumi Y, Ando Y. [Classification of amyloidosis]. *Brain and nerve = Shinkei kenkyu no*  
21 *shinpo*. 2014 Jul;66(7):731-7. PubMed PMID: 24998818.
- 22 53. Westermark P, Benson MD, Buxbaum JN, et al. Amyloid: toward terminology clarification.  
23 Report from the Nomenclature Committee of the International Society of Amyloidosis. *Amyloid : the*  
24 *international journal of experimental and clinical investigation : the official journal of the*  
25 *International Society of Amyloidosis*. 2005 Mar;12(1):1-4. doi: 10.1080/13506120500032196.  
26 PubMed PMID: 16076605.
- 27 54. Sipe JD, Benson MD, Buxbaum JN, et al. Nomenclature 2014: Amyloid fibril proteins and  
28 clinical classification of the amyloidosis. *Amyloid : the international journal of experimental and*  
29 *clinical investigation : the official journal of the International Society of Amyloidosis*. 2014  
30 Dec;21(4):221-4. doi: 10.3109/13506129.2014.964858. PubMed PMID: 25263598.
- 31 55. Kaeser SA, Herzig MC, Coomaraswamy J, et al. Cystatin C modulates cerebral beta-  
32 amyloidosis. *Nature genetics*. 2007 Dec;39(12):1437-9. doi: 10.1038/ng.2007.23. PubMed PMID:  
33 18026102.
- 34 56. Levy E, Sastre M, Kumar A, et al. Codeposition of cystatin C with amyloid-beta protein in  
35 the brain of Alzheimer disease patients. *Journal of neuropathology and experimental neurology*. 2001  
36 Jan;60(1):94-104. PubMed PMID: 11202179.
- 37 57. Martin-Rehrmann MD, Hoe HS, Capuani EM, et al. Association of apolipoprotein J-positive  
38 beta-amyloid plaques with dystrophic neurites in Alzheimer's disease brain. *Neurotoxicity research*.  
39 2005;7(3):231-42. PubMed PMID: 15897157.

- 1 58. Finn RD, Coghill P, Eberhardt RY, et al. The Pfam protein families database: towards a more  
2 sustainable future. *Nucleic acids research*. 2016 Jan 4;44(D1):D279-85. doi: 10.1093/nar/gkv1344.  
3 PubMed PMID: 26673716; PubMed Central PMCID: PMC4702930.
- 4 59. Balakrishnan R, Harris MA, Huntley R, et al. A guide to best practices for Gene Ontology  
5 (GO) manual annotation. *Database : the journal of biological databases and curation*.  
6 2013;2013:bat054. doi: 10.1093/database/bat054. PubMed PMID: 23842463; PubMed Central  
7 PMCID: PMC3706743.
- 8 60. Tsiolaki PL, Nastou KC, Hamodrakas SJ, et al. Mining databases for protein aggregation: a  
9 review. *Amyloid : the international journal of experimental and clinical investigation : the official  
10 journal of the International Society of Amyloidosis*. 2017 Sep;24(3):143-152. doi:  
11 10.1080/13506129.2017.1353966. PubMed PMID: 28719238.
- 12 61. Yates B, Braschi B, Gray KA, et al. Genenames.org: the HGNC and VGNC resources in  
13 2017. *Nucleic acids research*. 2017 Jan 4;45(D1):D619-D625. doi: 10.1093/nar/gkw1033. PubMed  
14 PMID: 27799471; PubMed Central PMCID: PMC5210531.
- 15 62. Altschul SF, Gish W, Miller W, et al. Basic local alignment search tool. *Journal of molecular  
16 biology*. 1990 Oct 5;215(3):403-10. doi: 10.1016/S0022-2836(05)80360-2. PubMed PMID: 2231712.
- 17 63. Lipman DJ, Pearson WR. Rapid and sensitive protein similarity searches. *Science*. 1985 Mar  
18 22;227(4693):1435-41. PubMed PMID: 2983426.
- 19 64. Sevimoglu T, Arga KY. The role of protein interaction networks in systems biomedicine.  
20 *Computational and structural biotechnology journal*. 2014 Aug;11(18):22-7. doi:  
21 10.1016/j.csbj.2014.08.008. PubMed PMID: 25379140; PubMed Central PMCID: PMC4212283.

22

23

24

1 **Tables**

2 Table 1. A comparison between AmyCo and other databases that include information of  
 3 diseases, associated with amyloid deposition.

| <b>Database features</b>          | <b>AmyCo<br/>(current work)</b>                                                                            | <b>Mutations in Hereditary Amyloidosis [14]</b>                                               | <b>AL-Base [34]</b>                                                                                                            | <b>AlzGene [35]</b>                  | <b>PDGene [36]</b>                   | <b>PDBase [37]</b>                                                              | <b>AD&amp;FTDMD [38]</b>                                             |
|-----------------------------------|------------------------------------------------------------------------------------------------------------|-----------------------------------------------------------------------------------------------|--------------------------------------------------------------------------------------------------------------------------------|--------------------------------------|--------------------------------------|---------------------------------------------------------------------------------|----------------------------------------------------------------------|
| <b>Database contents</b>          | 1) amyloidosis and<br>2) clinical conditions associated with amyloidosis.<br>Available protein components. | Genes and mutations in hereditary amyloidosis including their associated clinical phenotypes. | Immunoglobulin light chain sequences from patients with AL amyloidosis and patients with multiple myeloma or healthy controls. | GWAS studies in Alzheimer's disease. | GWAS studies in Parkinson's Disease. | Parkinson's Disease related genes, genetic variations, and functional elements. | Mutations in Alzheimer's disease and other frontotemporal disorders. |
| <b>Method of data retrieval</b>   | Manual                                                                                                     | Manual                                                                                        | Manual                                                                                                                         | Semi-automated                       | Semi-automated                       | Semi-automated                                                                  | Manual                                                               |
| <b>Literature references</b>      | Yes                                                                                                        | Yes                                                                                           | Yes                                                                                                                            | Yes                                  | Yes                                  | Yes                                                                             | Yes                                                                  |
| <b>Cross-referenced databases</b> | 6                                                                                                          | 3                                                                                             | 0                                                                                                                              | 3                                    | 3                                    | 6                                                                               | 0                                                                    |
| <b>User annotation</b>            | Yes                                                                                                        | Yes                                                                                           | No                                                                                                                             | No                                   | No                                   | No                                                                              | Yes                                                                  |

4

5

## 1 **Figure Legends**

2 Figure 1. An AmyCo disease entry. The user can access basic information about the disease,  
3 including the disease name, a MeSH short description, an ICD-10 classification and the major  
4 or other protein component, related to the disease. Cross-references to other databases are  
5 also provided. All data are available for download in text, JSON and XML formats.

6

## 1 Figures

## 2 Figure 1

**AmyCo**  
The Amyloidosis Collection

AmyCo Search Browse Blast Search Manual Download Contact

Download Text Download Json Download XML

### Basic Information

|                                                                              |                                                                                                                                                                                                                                                                                                                                                                                                                                                                                           |               |                    |                                  |                    |                          |                                   |                   |                    |                    |                    |                                                                              |  |
|------------------------------------------------------------------------------|-------------------------------------------------------------------------------------------------------------------------------------------------------------------------------------------------------------------------------------------------------------------------------------------------------------------------------------------------------------------------------------------------------------------------------------------------------------------------------------------|---------------|--------------------|----------------------------------|--------------------|--------------------------|-----------------------------------|-------------------|--------------------|--------------------|--------------------|------------------------------------------------------------------------------|--|
| <b>Disease Name:</b>                                                         | Dementia, familial British                                                                                                                                                                                                                                                                                                                                                                                                                                                                |               |                    |                                  |                    |                          |                                   |                   |                    |                    |                    |                                                                              |  |
| <b>ISA Name:</b>                                                             | ABri Amyloidosis                                                                                                                                                                                                                                                                                                                                                                                                                                                                          |               |                    |                                  |                    |                          |                                   |                   |                    |                    |                    |                                                                              |  |
| <b>Alternative Names:</b>                                                    | <ul style="list-style-type: none"><li>• Cerebral Amyloid Angiopathy, Itm2b-Related, 1</li><li>• Cerebral amyloid angiopathy, British type</li><li>• Presenile dementia with spastic ataxia</li><li>• Familial dementia, British type</li><li>• Dementia Familial British</li><li>• Bri Amyloidosis</li><li>• Familial British Dementia (FBD)</li></ul>                                                                                                                                    |               |                    |                                  |                    |                          |                                   |                   |                    |                    |                    |                                                                              |  |
| <b>MeSH Description:</b>                                                     | No information available                                                                                                                                                                                                                                                                                                                                                                                                                                                                  |               |                    |                                  |                    |                          |                                   |                   |                    |                    |                    |                                                                              |  |
| <b>Type:</b>                                                                 | Amyloidosis                                                                                                                                                                                                                                                                                                                                                                                                                                                                               |               |                    |                                  |                    |                          |                                   |                   |                    |                    |                    |                                                                              |  |
| <b>ICD-10 Classification:</b>                                                | Diseases of the Circulatory System                                                                                                                                                                                                                                                                                                                                                                                                                                                        |               |                    |                                  |                    |                          |                                   |                   |                    |                    |                    |                                                                              |  |
| <b>Tissue:</b>                                                               | Central Nervous System (CNS), Pancreas, Heart                                                                                                                                                                                                                                                                                                                                                                                                                                             |               |                    |                                  |                    |                          |                                   |                   |                    |                    |                    |                                                                              |  |
| <b>Major Components:</b>                                                     | Q9Y287: Integral membrane protein 2B                                                                                                                                                                                                                                                                                                                                                                                                                                                      |               |                    |                                  |                    |                          |                                   |                   |                    |                    |                    |                                                                              |  |
| <b>Other Components:</b>                                                     | <table border="1"><tr><td>O00468: Agrin</td><td>O75056: Syndecan-3</td></tr><tr><td>P01011: Alpha-1-antichymotrypsin</td><td>P01034: Cystatin-C</td></tr><tr><td>P02649: Apolipoprotein E</td><td>P02743: Serum amyloid P-component</td></tr><tr><td>P10909: Clusterin</td><td>P18827: Syndecan-1</td></tr><tr><td>P34741: Syndecan-2</td><td>P35052: Glypican-1</td></tr><tr><td>P98160: Basement membrane-specific heparan sulfate proteoglycan core protein</td><td></td></tr></table> | O00468: Agrin | O75056: Syndecan-3 | P01011: Alpha-1-antichymotrypsin | P01034: Cystatin-C | P02649: Apolipoprotein E | P02743: Serum amyloid P-component | P10909: Clusterin | P18827: Syndecan-1 | P34741: Syndecan-2 | P35052: Glypican-1 | P98160: Basement membrane-specific heparan sulfate proteoglycan core protein |  |
| O00468: Agrin                                                                | O75056: Syndecan-3                                                                                                                                                                                                                                                                                                                                                                                                                                                                        |               |                    |                                  |                    |                          |                                   |                   |                    |                    |                    |                                                                              |  |
| P01011: Alpha-1-antichymotrypsin                                             | P01034: Cystatin-C                                                                                                                                                                                                                                                                                                                                                                                                                                                                        |               |                    |                                  |                    |                          |                                   |                   |                    |                    |                    |                                                                              |  |
| P02649: Apolipoprotein E                                                     | P02743: Serum amyloid P-component                                                                                                                                                                                                                                                                                                                                                                                                                                                         |               |                    |                                  |                    |                          |                                   |                   |                    |                    |                    |                                                                              |  |
| P10909: Clusterin                                                            | P18827: Syndecan-1                                                                                                                                                                                                                                                                                                                                                                                                                                                                        |               |                    |                                  |                    |                          |                                   |                   |                    |                    |                    |                                                                              |  |
| P34741: Syndecan-2                                                           | P35052: Glypican-1                                                                                                                                                                                                                                                                                                                                                                                                                                                                        |               |                    |                                  |                    |                          |                                   |                   |                    |                    |                    |                                                                              |  |
| P98160: Basement membrane-specific heparan sulfate proteoglycan core protein |                                                                                                                                                                                                                                                                                                                                                                                                                                                                                           |               |                    |                                  |                    |                          |                                   |                   |                    |                    |                    |                                                                              |  |

### Interaction Network

Right click on Protein Nodes to go to UniProt.  
Red Colored Edges Indicate a connection between the disease and a Major Component, while Blue Colored Edges Indicate a connection with Other Components

### Cross-References

|                |                                            |
|----------------|--------------------------------------------|
| <b>MeSH:</b>   | C538208                                    |
| <b>ICD:</b>    | I68                                        |
| <b>OMIM:</b>   | 176500                                     |
| <b>PubMed:</b> | 2364266 7751849 10391242 11193180 11159188 |

3

# AmyCo

The Amyloidoses Collection

AmyCo Search Browse Blast Search Manual Download Contact

Download Text

Download Json

Download XML

## Basic Information

**Disease Name:** Dementia, familial British

**ISA Name:** ABri Amyloidosis

**Alternative Names:**

- Cerebral Amyloid Angiopathy, Itm2b-Related, 1
- Cerebral amyloid angiopathy, British type
- Presenile dementia with spastic ataxia
- Familial dementia, British type
- Dementia Familial British
- Bri Amyloidosis
- Familial British Dementia (FBD)

**MeSH Description:** No information available

**Type:** Amyloidosis

**ICD-10 Classification:** Diseases of the Circulatory System

**Tissue:** Central Nervous System (CNS), Pancreas, Heart

**Major Components:** Q9Y287: Integral membrane protein 2B

**Other Components:**

|                                                                              |                                   |
|------------------------------------------------------------------------------|-----------------------------------|
| O00468: Agrin                                                                | O75056: Syndecan-3                |
| P01011: Alpha-1-antichymotrypsin                                             | P01034: Cystatin-C                |
| P02649: Apolipoprotein E                                                     | P02743: Serum amyloid P-component |
| P10909: Clusterin                                                            | P18827: Syndecan-1                |
| P34741: Syndecan-2                                                           | P35052: Glypican-1                |
| P98160: Basement membrane-specific heparan sulfate proteoglycan core protein |                                   |

## Interaction Network

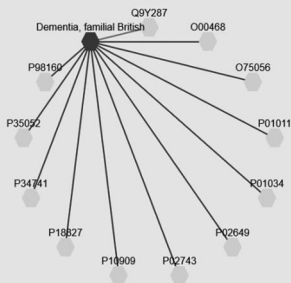

Right click on Protein Nodes to go to UniProt.

Red Colored Edges Indicate a connection between the disease and a Major Component, while Blue Colored Edges Indicate a connection with Other Components

## Cross-References

|                |                                            |
|----------------|--------------------------------------------|
| <b>MeSH:</b>   | C538208                                    |
| <b>ICD:</b>    | I68                                        |
| <b>OMIM:</b>   | 176500                                     |
| <b>PubMed:</b> | 2364266 7751049 10391242 11193180 11159188 |
